# Supplementary material for: Mesenchymal Stem Cell–Derived Small Extracellular Vesicles Promote Neuroprotection in a Genetic DBA/2J Mouse Model of Glaucoma
Source: PubMed Central journal article supplement — Invest Ophthalmol Vis Sci. 2018 Nov;59(13):5473–80. doi: 10.1167/iovs.18-25310 (PMC6735616; doi:10.1167/iovs.18-25310), 2018-11
Supplement: iovs-59-13-04_s01.pdf [file iovs-59-13-04_s01.pdf]

**Supplementary Table 1.** Genes and primers for the polymerase chain reaction.

| No | Gene (Human) | Sequence 5'→3'                                             | General gene function of the encoded protein |
|----|--------------|------------------------------------------------------------|----------------------------------------------|
| 1  | <i>LRP10</i> | (F) CAGACTGTCACCATCAGGTTC<br>(R) GAGAGGGGAGCGTAGGGTTA      | Housekeeping gene                            |
| 2  | <i>NR3C1</i> | (F) TGCCTGGTGTGCTCTGATGA<br>(R) CACATAGGTAATTGTGCTGTCCTT   | Glucocorticoid receptor                      |
| 3  | <i>NR3C2</i> | (F) GGGCAAAGGTACTIONTCCAGGATT<br>(R) GTGCATCCCCCTGGCATAGTT | Mineralocorticoid receptor                   |
| 4  | <i>FKBP5</i> | (F) TGGAAAGAAGTTTGATTCCAGTCAT<br>(R) CATGGTAGCCACCCCAATGT  | Glucocorticoid related                       |
| 5  | <i>PER1</i>  | (F) CACTCCTGCGACCAGGTA<br>(R) TAGGGGGCCACTCATGTCT          |                                              |
| 6  | <i>GILZ1</i> | (F) CCAGCGTGGTGGCCATAGA<br>(R) CACGCTCTAGCTGGGAGTTC        |                                              |
| 7  | <i>SGK1</i>  | (F) ACTCCTATGCATGCAAACACCC<br>(R) AGAAGGACTTGGTGGAGGAGAA   |                                              |
| 1  | <i>CDH5</i>  | proprietary by Qiagen                                      | Endothelial cell marker                      |
| 1  | <i>vWF</i>   | (F) GTGCCTGCAACTGTGTCAAC<br>(R) CAGGGTAGATGGTGCTTCGG       | Endothelial cell marker                      |
| 1  | <i>CD31</i>  | proprietary by Qiagen                                      | Endothelial cell marker                      |
| 1  | <i>CD34</i>  | (F) GCGCTTTGCTTGCTGAGTTTGC<br>(R) GCCTCATTGCCATGTTGAGACAC  | Endothelial cell marker                      |
| 2  | <i>PLVAP</i> | (F) CAACCTGGGTTACAACCTCTAC<br>(R) CTCCTTCTCCACCTTCTGTTTC   | Endothelial cell marker                      |
| 3  | <i>VIM</i>   | proprietary by Qiagen                                      | Endothelial cell marker                      |
