# Supplementary material for: Mesenchymal Stem Cell–Derived Small Extracellular Vesicles Promote Neuroprotection in a Genetic DBA/2J Mouse Model of Glaucoma
Source: PubMed Central journal article supplement — Invest Ophthalmol Vis Sci. 2018 Nov;59(13):5473–80. doi: 10.1167/iovs.18-25310 (PMC6735616; doi:10.1167/iovs.18-25310), 2018-11
Supplement: iovs-59-13-04_s02.pdf [file iovs-59-13-04_s02.pdf]

**Supplementary Table 2.** Mean and standard deviation (SD) of the log<sub>10</sub>-transformed relative gene expression values for both cortisol (10<sup>-7</sup> M) and control treated samples.

*The 95% confidence interval (CI) of the mean is shown next to each group. The p-values represent the statistical difference between these 2 groups using the mixed model analysis. P-values < 0.00625 (adjusted for multiple testing) were considered significant (highlighted in bold).*

| Gene         | Control (n=51) |       |                    |        | Cortisol 10 <sup>-7</sup> M (n=49) |       |                    |        | Mixed model analysis |
|--------------|----------------|-------|--------------------|--------|------------------------------------|-------|--------------------|--------|----------------------|
|              | Mean           | SD    | 95% CI of the mean |        | Mean                               | SD    | 95% CI of the mean |        | p-value              |
|              |                |       | Lower              | Upper  |                                    |       | Lower              | Upper  |                      |
| <i>NR3C1</i> | -0.806         | 0.033 | -0.873             | -0.739 | -0.800                             | 0.031 | -0.862             | -0.739 | 0.488                |
| <i>NR3C2</i> | -1.177         | 0.036 | -1.250             | -1.105 | -1.264                             | 0.050 | -1.363             | -1.164 | <b>0.004</b>         |
| <i>FKBP5</i> | -0.566         | 0.030 | -0.627             | -0.505 | -0.248                             | 0.032 | -0.312             | -0.183 | <b>0.000</b>         |
| <i>PER1</i>  | -1.347         | 0.050 | -1.447             | -1.247 | -0.791                             | 0.047 | -0.886             | -0.696 | <b>0.000</b>         |
| <i>GILZ1</i> | -1.417         | 0.023 | -1.463             | -1.372 | -1.035                             | 0.027 | -1.089             | -0.981 | <b>0.000</b>         |
| <i>SGK1</i>  | 0.179          | 0.052 | 0.074              | 0.285  | 0.295                              | 0.043 | 0.209              | 0.381  | 0.0063               |
| <i>CDH5</i>  | 0.547          | 0.027 | 0.493              | 0.602  | 0.564                              | 0.026 | 0.512              | 0.616  | 0.385                |
| <i>VIM</i>   | 1.677          | 0.019 | 1.639              | 1.715  | 1.688                              | 0.018 | 1.651              | 1.724  | 0.702                |
